# Supplementary material
Source: PubMed Central journal article supplement (PMC3130825)
Supplement: NIHMS251428-supplement-1_si_001.pdf [file NIHMS251428-supplement-1_si_001.pdf]

**Nicotinic Acetylcholine Receptor Efficacy and Pharmacological Properties of 3-(Substituted phenyl)-2 $\beta$ -substituted Tropanes**

F. Ivy Carroll,<sup>\*,†</sup> Bruce E. Blough,<sup>†</sup> S. Wayne Mascarella,<sup>†</sup> Hernán A. Navarro,<sup>†</sup> J. Brek Eaton,<sup>‡</sup>  
Ronald J. Lukas,<sup>‡</sup> and M. Imad Damaj<sup>§</sup>

Center for Organic and Medicinal Chemistry, Research Triangle Institute, Research Triangle Park, North Carolina 27709-2194; Division of Neurobiology, Barrow Neurological Institute, 350 West Thomas Road, Phoenix, AZ 85013; Department of Pharmacology and Toxicology, Medical Campus, Virginia Commonwealth University, Richmond, VA 23219

**Supporting Information:  
Analysis Appendix**

\*Corresponding author:

Dr. F. Ivy Carroll

Research Triangle Institute

Post Office Box 12194

Research Triangle Park, NC 27709-2194

Telephone: 919-541-6679

Fax: 919-541-8868

Email: [fic@rti.org](mailto:fic@rti.org)

<sup>†</sup> Research Triangle Institute

<sup>‡</sup> Barrow Neurological Institute

<sup>§</sup> Virginia Commonwealth University

---

**Analysis Appendix**


---

| Compound                                                                   | Formula                                                                               | Calculated |      |      | Found |      |      |
|----------------------------------------------------------------------------|---------------------------------------------------------------------------------------|------------|------|------|-------|------|------|
|                                                                            |                                                                                       | C          | H    | N    | C     | H    | N    |
| <b>4h</b> •tartate                                                         | C <sub>20</sub> H <sub>26</sub> ClNO <sub>8</sub>                                     | 54.12      | 5.90 | 3.16 | 53.88 | 6.01 | 3.13 |
| <b>4i</b> •HCl                                                             | C <sub>19</sub> H <sub>25</sub> Cl <sub>2</sub> N <sub>2</sub> O                      | 61.96      | 6.84 | 7.61 | 61.97 | 6.72 | 7.56 |
| <b>4j</b> •HCl                                                             | C <sub>24</sub> H <sub>27</sub> Cl <sub>2</sub> N <sub>2</sub> O                      | 66.97      | 6.32 | 6.51 | 67.10 | 6.26 | 6.53 |
| <b>4f</b> •2HCl                                                            | C <sub>23</sub> H <sub>26</sub> Cl <sub>3</sub> N <sub>3</sub> •1.75 H <sub>2</sub> O | 57.03      | 6.56 | 8.68 | 57.03 | 6.46 | 8.50 |
| <b>4k</b> •CH <sub>3</sub> C <sub>6</sub> H <sub>4</sub> SO <sub>3</sub> H | C <sub>24</sub> H <sub>30</sub> ClNO <sub>5</sub> S•0.25 H <sub>2</sub> O             | 59.49      | 6.34 | 2.89 | 59.62 | 6.14 | 2.99 |

---
